# Supplementary material for: Optically active polymer particles with programmable surface microstructures constructed using chiral helical polyacetylene
Source: Royal Society of Chemistry journal article supplement (doi:10.1039/d2nr03328c), 2022-01-01
Supplement: d2nr03328c1.pdf [file d2nr03328c1.pdf]

## Supporting Information

### **Optically active polymer particles with programmable surface microstructures constructed by chiral helical polyacetylene**

Hai Zhong, Hongfang Yang, Jiaqi Shang, Biao Zhao and Jianping Deng\*

State Key Laboratory of Chemical Resource Engineering, College of Materials Science and Engineering, Beijing University of Chemical Technology, Beijing 100029, China.

#### **\*Corresponding Author**

Jianping Deng; E-mail: dengjp@mail.buct.edu.cn

**Table S1.** The elemental analysis data for PGMA seeds, JTPs, alkynyl-JTPs and *S*-JPs.

|               | N [%] | C [%] | H [%] |
|---------------|-------|-------|-------|
| PGMA seeds    | 0.01  | 58.89 | 7.2   |
| JTPs          | 0.01  | 58.61 | 7.24  |
| Alkynyl-JTPs  | 4.16  | 57.43 | 7.48  |
| <i>S</i> -JPs | 4.26  | 59.9  | 7.37  |

The content of PolySM in *S*-JPs can be determined based on the N content.

$$\text{Content of PolySM (wt\%)} = (N_{S\text{-JPs}}\% - N_{\text{Alkynyl-JTPs}}\%)/(N_{\text{M}}\% - N_{\text{Alkynyl-JTPs}}\%) = 3 \text{ wt\%}$$

**Table S2.** The elemental analysis data for PGMA seeds, GTPs, alkynyl-GTPs and *S*-GPs.

|               | N [%] | C [%] | H [%] |
|---------------|-------|-------|-------|
| PGMA seeds    | 0.01  | 58.89 | 7.2   |
| GTPs          | 0.01  | 61.17 | 7.26  |
| Alkynyl-GTPs  | 3.64  | 61.03 | 7.42  |
| <i>S</i> -GPs | 4.1   | 60.92 | 7.52  |

The content of PolySM in *S*-GPs can be determined based on the N content.

$$\text{Content of PolySM (wt\%)} = (N_{S\text{-GPs}}\% - N_{\text{Alkynyl-GTPs}}\%)/(N_{\text{M}}\% - N_{\text{Alkynyl-GTPs}}\%) = 11.9 \text{ wt\%}$$

**Table S3.** The elemental analysis data for PGMA seeds, RTPs, alkynyl-RTPs and *S*-RPs.

|               | N [%] | C [%] | H [%] |
|---------------|-------|-------|-------|
| PGMA seeds    | 0.01  | 58.59 | 7.2   |
| RTPs          | 0.01  | 80.43 | 7.64  |
| Alkynyl-RTPs  | 1.48  | 78.83 | 7.88  |
| <i>S</i> -RPs | 2.22  | 78.48 | 7.63  |

The content of PolySM in *S*-RPs can be determined based on the N content.

$$\text{Content of PolySM (wt\%)} = (N_{S\text{-RPs}}\% - N_{\text{Alkynyl-RTPs}}\%)/(N_{\text{M}}\% - N_{\text{Alkynyl-RTPs}}\%) = 12.3 \text{ wt\%}$$

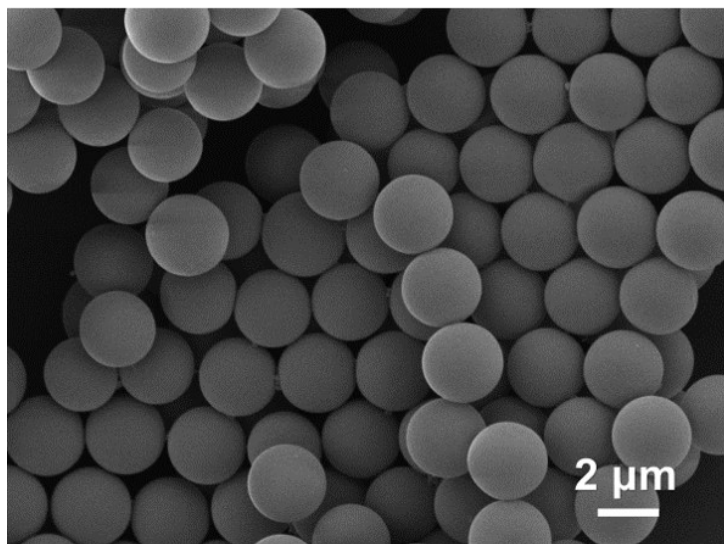

**Figure S1.** SEM image of PGMA seed particles.

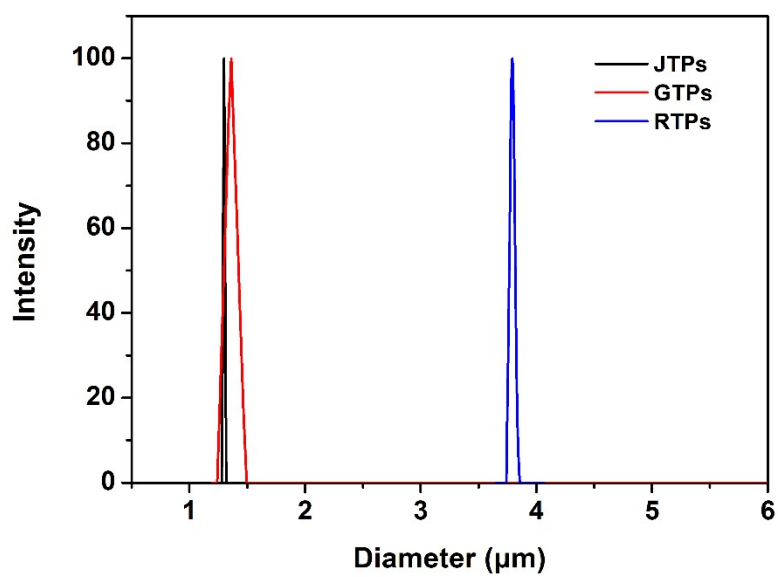

**Figure S2.** DLS size distribution of JTPs, GTPs, and RTPs.

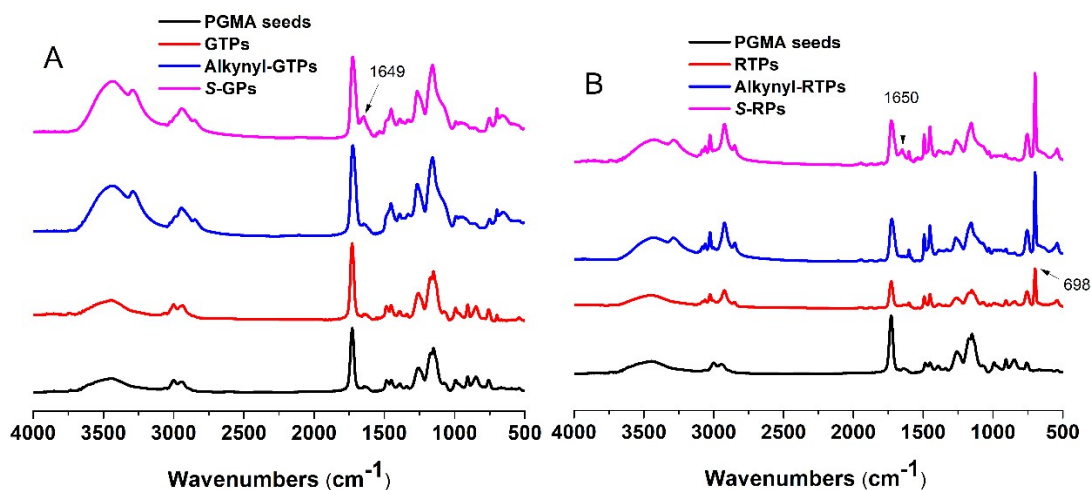

**Figure S3.** Typical FT-IR spectra of (A) PGMA seed particles, GTPs, alkynyl-GTPs, and *S*-GPs; (B) PGMA seed particles, RTPs, alkynyl-RTPs, and *S*-RPs.

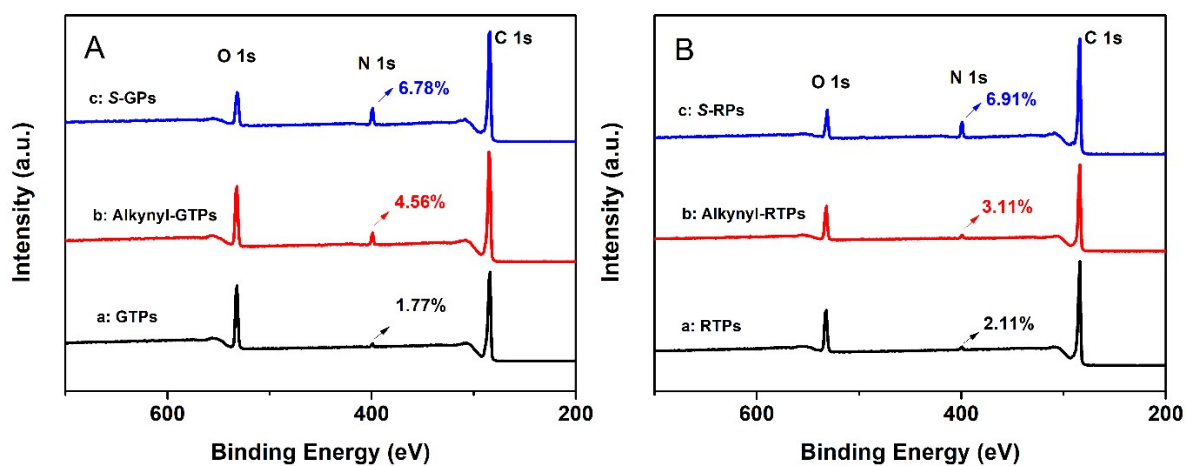

**Figure S4.** XPS spectra recorded on the surface of (A) GTPs, alkynyl-GTPs, and *S*-GPs; (B) RTPs, alkynyl-RTPs, and *S*-RPs.

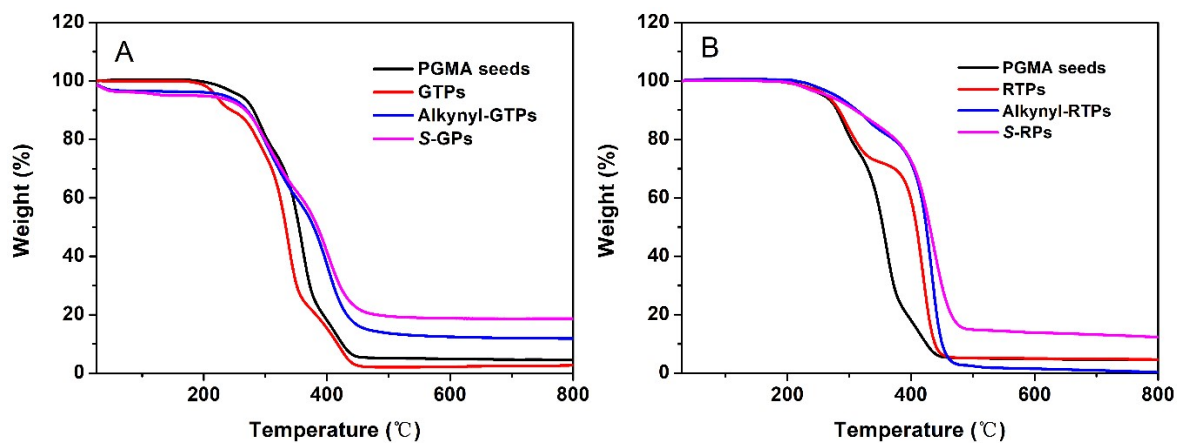

**Figure S5.** TGA curves of (A) GTPs, alkynyl-GTPs, and *S*-GPs; (B) RTPs, alkynyl-RTPs, and *S*-RPs.

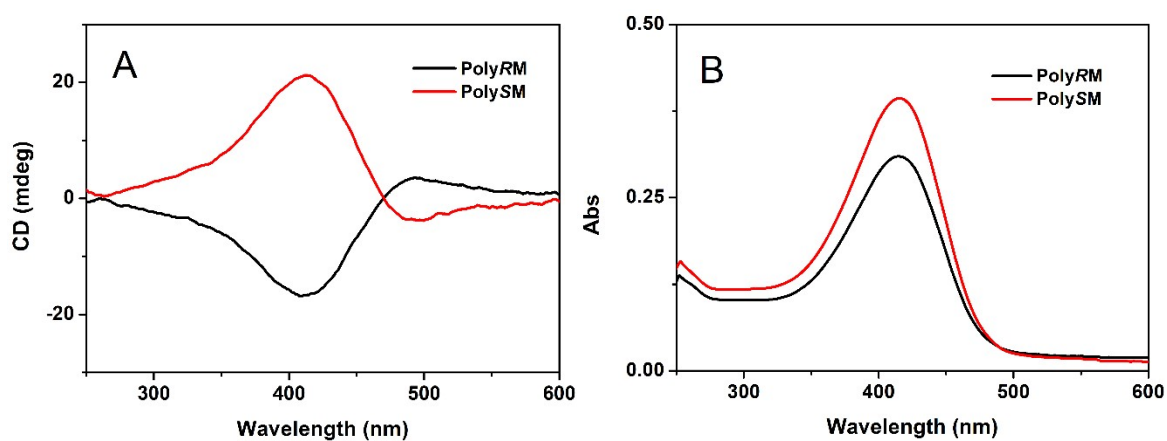

**Figure S6.** CD (A) and UV-vis absorption (B) spectra of PolyRM and PolySM in CHCl<sub>3</sub> solution ( $c = 0.17$  mM, by the M unit).

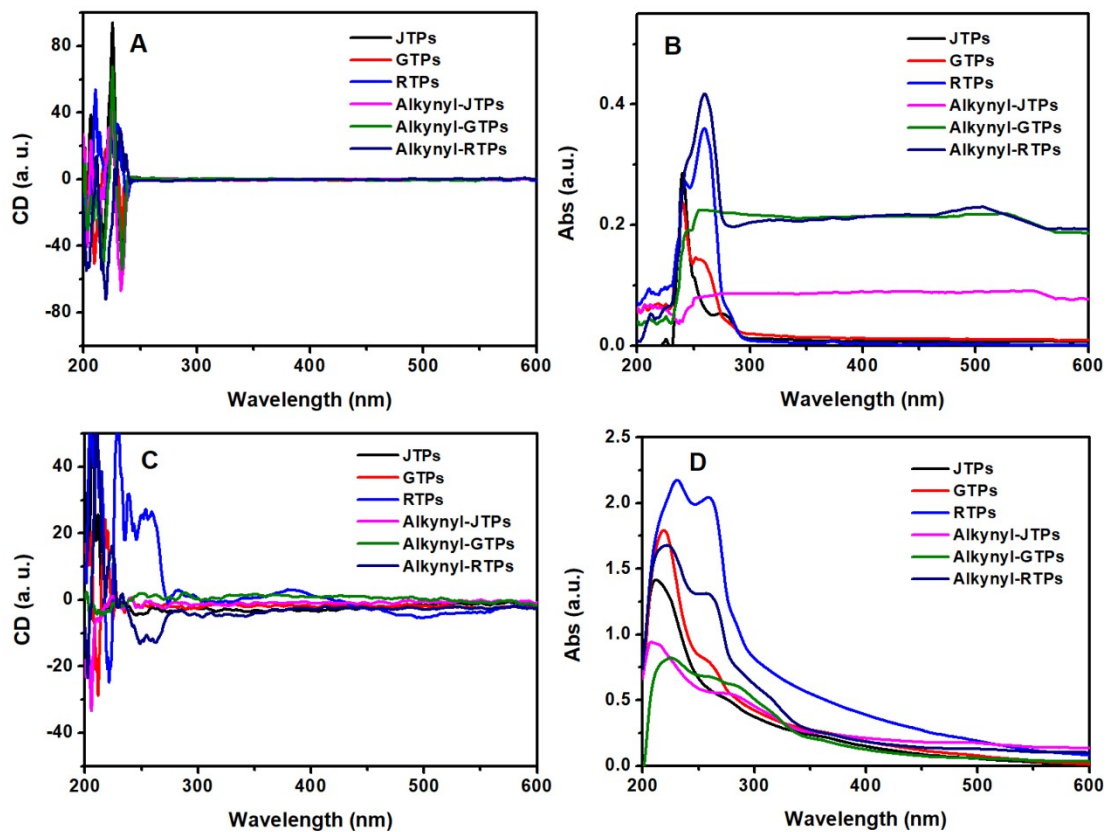

**Figure S7.** CD (A and C) and UV-vis absorption (B and D) spectra of JTPs, GTPs, RTPs, alkynyl-JTPs, alkynyl-GTPs and alkynyl-RTPs. Samples were tested by dispersing them in CHCl<sub>3</sub> solution (A and B) and in KBr tablet form (C and D) at room temperature.
